# Supplementary material for: Genome sequencing and analysis of the biomass-degrading fungus Trichoderma reesei (syn. Hypocrea jecorina)
Source: Springer Nature journal article supplement (doi:10.1038/nbt1403), 2008-05-01
Supplement: 41587_2008_BFnbt1403_MOESM6_ESM.pdf [file 41587_2008_BFnbt1403_MOESM6_ESM.pdf]

## Supplementary Note 1

### *Transposable elements*

BLASTN searches with known fungal transposon sequences<sup>1</sup> revealed degenerate class I and II elements. Among class II homologs were several En/Spm-like sequences distantly related to higher plant transposases. Multiple sequences with similarity to *Fusarium oxysporum* hop1, *F. oxysporum* impala, and *Magnaporthe oryzae* pot2 were also detected. All sequences contained multiple stop codons, and terminal inverted repeats, typical of class II elements, were absent.

Copia class retroelements flanked by near perfect long terminal repeats (LTRs) were located on scaffolds 4 (coordinates 1206479 - 1211609), 42 (56255 - 61289), and 87 (4179 - 9853). Typical of such elements, remnants and “solo LTRs”<sup>2,3</sup> were distributed on 11 scaffolds. Similarly, a gypsy class retroelement was located on scaffolds 16 (578302-585660), 54 (2146-9683), and 147 (365-7059) with five solo LTRs at separate locations. Again, numerous stop codons were present indicating that *T. reesei* strain QM6a contains no active TEs. As has been repeatedly shown in other Ascomycetes, active processes such as repeat induced point mutation (RIP)<sup>4</sup> may have attenuated the spread of transposons in *T. reesei*. Base composition ratios, TpA/ApT and (CpA + TpG)/(ApC+Gpt) within degenerate sequences are consistent with such a mechanism.

### *Scaffolds containing the discovered repeat TTAGGG*

The telomeric repeat TTAGGG was identified on the following seven scaffolds in the *T. reesei* genome assembly, identical to the *N. crassa* telomere repeat<sup>5</sup>.

| Scaffold    |
|-------------|
| scaffold_31 |
| scaffold_1  |
| scaffold_46 |
| scaffold_45 |
| scaffold_65 |
| scaffold_64 |
| scaffold_87 |

## References:

1. Daboussi, M.J. and Capy, P. Transposable elements in filamentous fungi. *Annu. Rev. Microbiol.* **57**, 275-299 (2003).
2. Goodwin, T.J. and Poulter, R.T. Multiple LTR-retrotransposon families in the asexual yeast *Candida*

*albicans*. *Genome Res.* **10**, 174-191 (2000).

3. Kim, J.M., Vanguri, S., Boeke, J.D., Gabriel, A., and Voytas, D.F. Transposable elements and genome organization: a comprehensive survey of retrotransposons revealed by the complete *Saccharomyces cerevisiae* genome sequence. *Genome Res.* **8**, 464-478 (1998).
4. Galagan, J.E. and Selker, E.U. RIP: the evolutionary cost of genome defense. *Trends Genet.* **20**, 417-423 (2004).
5. Schechtman, M.G. Characterization of the telomere DNA from *Neurospora crassa*. *Gene* **88**, 159-165 (1990).

## Supplementary Note 2

At the more detailed scale of families that compose CAZyme classes we checked whether the general trends observed for the classes could be confirmed. We also looked for CAZyme families that could be significantly divergent in *T. reesei* compared to the other fungi. At the class level, GHs appeared to exhibit higher variability than GTs and this trend was also verified at the family level. The standard deviation for GH families (SD=4.2, average SD per family = 2.1) is higher than for GTs (SD=3, average SD per family = 1.3). Similarly, 60 different GH families are observed in fungi, as compared with 35 GT families. Moreover, despite the higher number of GH than GT families in fungi, more GT families (16) than GH families (11) are universally found in our dataset. *T. reesei* covers 48 families of GHs and 30 families of GTs, which is very close to the Sordariomycetes average repertoire (47 and 30 GH and GT families respectively).

At a higher resolution, we tested whether particular families were specifically present, missing, expanded or reduced in *T. reesei* compared to other fungi (**Supplementary Table 4**). We applied the statistical test described in the **Methods** which takes into account the variability and population size both for species and CAZyme families. For example, *T. reesei* was found to be enriched in seven GH, one GT and one PL families and reduced in two GH and one GT families and the CBMs.

**Supplementary Table 1:** Libraries used for genome sequencing.

| <b>Library Designation</b>     | <b>Insert Size</b> | <b>No. Reads</b> | <b>Source</b>     |
|--------------------------------|--------------------|------------------|-------------------|
| <b>QCAA</b>                    | 3 kb               | 1317             | JGI <sup>a</sup>  |
| <b>UWU</b>                     | 3 kb               | 197293           | JGI               |
| <b>VTN</b>                     | 8 kb               | 205430           | JGI               |
| <b>VTM</b>                     | 37 kb              | 23034            | JGI               |
| <b>BAC Library<sup>b</sup></b> | 97-190 kb          | 6789             | NCSU <sup>c</sup> |
| <b>Total Reads</b>             |                    | 433863           |                   |

<sup>a</sup>Joint Genome Institute.

<sup>b</sup>Large insert bacterial artificial chromosome.

<sup>c</sup>Fungal Genomics Laboratory, North Carolina State University.

**Supplementary Table 2a.** Syntenic blocks in the genomes of *T. reesei*, *F. graminearum* and *N. crassa*.

| Organism              | No. Blocks | Total Orthologs to <i>T. reesei</i> | % <i>T. reesei</i> genes | Orthologs in synteny | % <i>T. reesei</i> Orthologs |
|-----------------------|------------|-------------------------------------|--------------------------|----------------------|------------------------------|
| <i>F. graminearum</i> | 535        | 6580                                | 72                       | 5372                 | 81%                          |
| <i>N. crassa</i>      | 538        | 5624                                | 62                       | 4834                 | 86%                          |

**Supplementary Table 2b.** General features of *T. reesei* genes in syntenic and non-syntenic regions.

|                   | Organism Compared                        | G+C % | Length (nucleotide) | No. Genes | Density (Nucl./Gene) | exon length Mean | intron length Mean | Gene Length Mean |
|-------------------|------------------------------------------|-------|---------------------|-----------|----------------------|------------------|--------------------|------------------|
| Syntenic regions  | <i>F. graminearum</i>                    | 54.4% | 21.5Mb              | 6229      | 3.45 kb              | 536              | 119                | 1844             |
|                   | <i>N. crassa</i>                         | 54.6% | 16.9Mb              | 4834      | 3.49 kb              | 534              | 121                | 1876             |
| Gap Regions       | <i>F. graminearum</i>                    | 50.2% | 11.9Mb              | 2900      | 4.11 kb              | 447              | 117                | 1682             |
|                   | <i>N. crassa</i>                         | 51.9% | 16.4Mb              | 4295      | 3.82 kb              | 475              | 115                | 1700             |
| conserved Synteny | <i>f. graminearum</i> + <i>N. crassa</i> | 54.8% | 14.5 Mb             | 4390      | 3.31 kb              | 536              | 120                | 1575             |
| conserved Gaps    | <i>F. graminearum</i> + <i>N. crassa</i> | 49.4% | 9.7Mb               | 2270      | 4.25 kb              | 435              | 115                | 1645             |

**Supplementary Table 2c.** Comparison of domain content (identified by Interpro) in *T. reesei* genes that lie in syntenic blocks vs. gaps. Only the 20 most represented domain are shown.

| <i>Regions with Synteny to F. graminearum</i> |                                                       |                                    |
|-----------------------------------------------|-------------------------------------------------------|------------------------------------|
| IPR Id                                        | IPR Description                                       | <i>T. reesei</i> Genes with Domain |
| IPR001680                                     | G-protein beta WD-40 repeat                           | 103                                |
| IPR001138                                     | Fungal transcriptional regulatory protein, N-terminal | 96                                 |
| IPR002290                                     | Serine/threonine protein kinase                       | 77                                 |
| IPR007114                                     | Major facilitator superfamily                         | 69                                 |
| IPR003593                                     | AAA ATPase                                            | 65                                 |
| IPR007087                                     | Zn-finger, C2H2 type                                  | 54                                 |
| IPR001650                                     | Helicase, C-terminal                                  | 53                                 |
| IPR000504                                     | RNA-binding region RNP-1 (RNA recognition motif)      | 45                                 |
| IPR000379                                     | Esterase/lipase/thioesterase                          | 43                                 |
| IPR000051                                     | SAM (and some other nucleotide) binding motif         | 34                                 |
| IPR002110                                     | Ankyrin                                               | 33                                 |
| IPR005225                                     | Small GTP-binding protein domain                      | 33                                 |
| IPR002048                                     | Calcium-binding EF-hand                               | 28                                 |
| IPR002198                                     | Short-chain dehydrogenase/reductase SDR               | 26                                 |
| IPR001440                                     | TPR repeat                                            | 25                                 |
| IPR001005                                     | Myb, DNA-binding                                      | 22                                 |
| IPR001810                                     | Cyclin-like F-box                                     | 21                                 |
| IPR001623                                     | Heat shock protein DnaJ, N-terminal                   | 21                                 |
| IPR000205                                     | NAD-binding site                                      | 19                                 |
| IPR002347                                     | Glucose/ribitol dehydrogenase                         | 19                                 |

| <b>Regions with NO synteny to <i>F. graminearum</i></b> |                                                       |                                           |
|---------------------------------------------------------|-------------------------------------------------------|-------------------------------------------|
| <b>IPR Id</b>                                           | <b>IPR Description</b>                                | <b><i>T. reesei</i> Genes with Domain</b> |
| IPR001138                                               | Fungal transcriptional regulatory protein, N-terminal | 98                                        |
| IPR007114                                               | Major facilitator superfamily                         | 74                                        |
| IPR000379                                               | Esterase/lipase/thioesterase                          | 52                                        |
| IPR002347                                               | Glucose/ribitol dehydrogenase                         | 39                                        |
| IPR002110                                               | Ankyrin                                               | 33                                        |
| IPR000051                                               | SAM (and some other nucleotide) binding motif         | 31                                        |
| IPR002198                                               | Short-chain dehydrogenase/reductase SDR               | 31                                        |
| IPR003663                                               | Sugar transporter                                     | 29                                        |
| IPR001128                                               | Cytochrome P450                                       | 29                                        |
| IPR003593                                               | AAA ATPase                                            | 27                                        |
| IPR010730                                               | Heterokaryon incompatibility                          | 26                                        |
| IPR001680                                               | G-protein beta WD-40 repeat                           | 22                                        |
| IPR007219                                               | Fungal specific transcription factor                  | 20                                        |
| IPR002290                                               | Serine/threonine protein kinase                       | 19                                        |
| IPR002293                                               | Amino acid/polyamine transporter I                    | 19                                        |
| IPR002085                                               | Zinc-containing alcohol dehydrogenase superfamily     | 18                                        |
| IPR001810                                               | Cyclin-like F-box                                     | 17                                        |
| IPR000182                                               | GCN5-related N-acetyltransferase                      | 17                                        |
| IPR001395                                               | Aldo/keto reductase                                   | 15                                        |
| IPR000254                                               | Cellulose-binding region, fungal                      | 14                                        |

Supplementary Table 3. Protein families in *T. reesei*.

| Interpro entry | Peizizomycotina              |                             |                             |                           |                           | Saccharomycotina         |                        |                         |                         |                              | Category | Interpro entry name | Reason for Interpro entry count difference <i>T. reesei</i> versus <i>Peizizomycotina</i> |                             |                                                                |                            |
|----------------|------------------------------|-----------------------------|-----------------------------|---------------------------|---------------------------|--------------------------|------------------------|-------------------------|-------------------------|------------------------------|----------|---------------------|-------------------------------------------------------------------------------------------|-----------------------------|----------------------------------------------------------------|----------------------------|
|                | <i>Aspergillus fumigatus</i> | <i>Aspergillus nidulans</i> | <i>Fusarium graminearum</i> | <i>Trichoderma reesei</i> | <i>Magnaporthe grisea</i> | <i>Neurospora crassa</i> | <i>Ashyba gossypii</i> | <i>Candida albicans</i> | <i>Candida glabrata</i> | <i>Debaryomyces hansenii</i> |          |                     |                                                                                           | <i>Kluyveromyces lactis</i> | <i>Saccharomyces cerevisiae</i>                                | <i>Yarrowia lipolytica</i> |
| IPR003117      | 0                            | 0                           | 0                           | 1                         | 0                         | 0                        | 1                      | 1                       | 1                       | 1                            | 1        | 1                   | 1                                                                                         | Signal transduction         | cAMP-dependent protein kinase regulator, type II PKA R subunit | Mutation                   |
| IPR004202      | 0                            | 0                           | 0                           | 1                         | 0                         | 0                        | 1                      | 0                       | 0                       | 1                            | 1        | 1                   | 1                                                                                         | Mitochondrion               | Cytochrome c oxidase subunit VIIc                              | Mutation                   |
| IPR004556      | 0                            | 0                           | 0                           | 1                         | 0                         | 0                        | 1                      | 1                       | 1                       | 1                            | 1        | 1                   | 1                                                                                         | Methylation                 | Modification methylase HemK                                    | Mutation                   |
| IPR002315      | 1                            | 1                           | 1                           | 3                         | 1                         | 1                        | 1                      | 1                       | 1                       | 2                            | 1        | 2                   | 1                                                                                         | Protein biosynthesis        | Glycyl-tRNA synthetase, alpha-2                                | Mutation/Presence          |
| IPR002413      | 0                            | 1                           | 0                           | 3                         | 1                         | 1                        | 1                      | 0                       | 1                       | 1                            | 0        | 0                   | 0                                                                                         | Secreted?                   | Ves allergen                                                   | Mutation/Presence          |
| IPR012734      | 1                            | 1                           | 0                           | 3                         | 0                         | 0                        | 1                      | 1                       | 0                       | 0                            | 0        | 0                   | 0                                                                                         | Carbohydrate metabolism     | Dihydroxycetone kinase                                         | Mutation/Presence          |
| IPR010636      | 0                            | 0                           | 1                           | 6                         | 2                         | 1                        | 0                      | 0                       | 0                       | 0                            | 0        | 0                   | 0                                                                                         | Hydrophobin                 | Hydrophobin 2 (i.e. class II)                                  | Presence                   |
| IPR006710      | 15                           | 13                          | 14                          | 2                         | 15                        | 5                        | 0                      | 0                       | 0                       | 0                            | 0        | 0                   | 0                                                                                         | Plant biomass degradation   | Glycoside hydrolase, family 43                                 | Mutation                   |
| IPR001077      | 10                           | 15                          | 8                           | 3                         | 12                        | 8                        | 0                      | 0                       | 0                       | 1                            | 0        | 0                   | 0                                                                                         | 2ndary metabolism           | O-methyltransferase, family 2                                  | Mutation                   |
| IPR001000      | 5                            | 5                           | 9                           | 1                         | 5                         | 10                       | 1                      | 2                       | 2                       | 0                            | 0        | 2                   | 1                                                                                         | Glycoside hydrolase         | Glycoside hydrolase, family 10                                 | Mutation                   |
| IPR011118      | 5                            | 7                           | 7                           | 0                         | 9                         | 1                        | 0                      | 0                       | 0                       | 1                            | 0        | 0                   | 0                                                                                         | Plant biomass degradation   | Tannase and feruloyl esterase                                  | Absence                    |
| IPR002022      | 6                            | 8                           | 9                           | 0                         | 2                         | 1                        | 0                      | 0                       | 0                       | 0                            | 0        | 0                   | 0                                                                                         | Plant biomass degradation   | Pectate lyase/Amb allergen                                     | Mutation                   |
| IPR001557      | 3                            | 4                           | 3                           | 1                         | 4                         | 3                        | 2                      | 3                       | 3                       | 3                            | 3        | 3                   | 2                                                                                         | Glycolysis                  | L-lactate/malate dehydrogenase                                 | Mutation/Absence           |
| IPR004898      | 3                            | 5                           | 7                           | 0                         | 1                         | 1                        | 0                      | 0                       | 0                       | 0                            | 0        | 0                   | 0                                                                                         | Plant biomass degradation   | Pectate lyase                                                  | Absence                    |
| IPR000421      | 2                            | 1                           | 4                           | 0                         | 3                         | 6                        | 0                      | 0                       | 0                       | 1                            | 0        | 0                   | 1                                                                                         | Secreted?                   | Coagulation factor 5/8 type, C-terminal                        | Mutation                   |
| IPR011251      | 3                            | 2                           | 3                           | 0                         | 2                         | 4                        | 1                      | 2                       | 0                       | 1                            | 1        | 0                   | 6                                                                                         | Monooxygenase               | Bacterial luciferase-like                                      | Mutation                   |
| IPR000070      | 5                            | 3                           | 2                           | 0                         | 2                         | 2                        | 0                      | 0                       | 0                       | 0                            | 0        | 0                   | 0                                                                                         | Plant biomass degradation   | Pectinesterase                                                 | Mutation                   |
| IPR008701      | 2                            | 2                           | 4                           | 0                         | 4                         | 1                        | 0                      | 0                       | 0                       | 0                            | 0        | 0                   | 0                                                                                         | Plant infection             | Necrosis inducing                                              | Mutation/Absence           |
| IPR008279      | 4                            | 1                           | 2                           | 0                         | 2                         | 2                        | 0                      | 0                       | 1                       | 1                            | 1        | 1                   | 1                                                                                         | Phosphorylation             | PEP-utilising enzyme, mobile region                            | Mutation                   |
| IPR004199      | 1                            | 2                           | 3                           | 0                         | 3                         | 2                        | 0                      | 0                       | 0                       | 1                            | 1        | 0                   | 0                                                                                         | Glycoside hydrolase         | Glycoside hydrolase, family 42, domain 5                       | Mutation                   |
| IPR000383      | 1                            | 3                           | 4                           | 0                         | 2                         | 1                        | 0                      | 0                       | 0                       | 0                            | 0        | 0                   | 0                                                                                         | Protein degradation         | Peptidase S15                                                  | Mutation                   |
| IPR001425      | 1                            | 1                           | 5                           | 0                         | 1                         | 2                        | 0                      | 1                       | 3                       | 1                            | 0        | 4                   | 0                                                                                         | Opsins                      | Bacterial rhodopsin                                            | Mutation                   |
| IPR010720      | 2                            | 3                           | 2                           | 0                         | 2                         | 1                        | 0                      | 0                       | 0                       | 1                            | 0        | 0                   | 0                                                                                         | Glycoside hydrolase         | Alpha-L-arabinofuranosidase, C-terminal                        | Absence                    |
| IPR001338      | 4                            | 3                           | 1                           | 0                         | 1                         | 1                        | 0                      | 0                       | 0                       | 0                            | 0        | 1                   | 0                                                                                         | Hydrophobin                 | Fungal hydrophobin (i.e. class I)                              | Absence                    |
| IPR010126      | 1                            | 1                           | 3                           | 0                         | 2                         | 3                        | 0                      | 0                       | 0                       | 0                            | 0        | 0                   | 0                                                                                         | Plant biomass degradation   | Esterase, PHB depolymerase                                     | Mutation                   |
| IPR002229      | 2                            | 1                           | 3                           | 0                         | 1                         | 2                        | 0                      | 0                       | 1                       | 0                            | 0        | 0                   | 0                                                                                         | Secreted?                   | Blood group Rhesus C/E and D polypeptide                       | Mutation                   |
| IPR005914      | 2                            | 2                           | 1                           | 0                         | 1                         | 2                        | 0                      | 0                       | 0                       | 0                            | 0        | 0                   | 0                                                                                         | Lipid metabolism            | Acetoacetyl-CoA synthase                                       | Mutation                   |
| IPR001106      | 1                            | 2                           | 1                           | 0                         | 1                         | 1                        | 0                      | 0                       | 0                       | 0                            | 0        | 0                   | 0                                                                                         | Amino acid metabolism       | Phenylalanine/histidine ammonia-lyase                          | Absence                    |
| IPR012104      | 1                            | 1                           | 1                           | 0                         | 1                         | 1                        | 2                      | 2                       | 3                       | 2                            | 2        | 3                   | 1                                                                                         | Cell cycle                  | Cyclin, fungal Pcl/HCS26                                       | Mutation                   |
| IPR008076      | 1                            | 1                           | 1                           | 0                         | 1                         | 1                        | 0                      | 0                       | 0                       | 0                            | 0        | 0                   | 0                                                                                         | Cyanate metabolism          | Cyanase                                                        | Absence                    |
| IPR012235      | 1                            | 1                           | 1                           | 0                         | 1                         | 1                        | 1                      | 1                       | 1                       | 1                            | 1        | 1                   | 1                                                                                         | Leucine biosynthesis        | 3-isopropylmalate dehydratase, fus small/large subunits        | Mutation                   |
| IPR003702      | 1                            | 1                           | 1                           | 0                         | 1                         | 1                        | 1                      | 1                       | 1                       | 1                            | 1        | 1                   | 1                                                                                         | Acetyl-CoA metabolism       | Acetyl-CoA hydrolase/transferase                               | Absence                    |
| IPR004235      | 1                            | 1                           | 1                           | 0                         | 1                         | 1                        | 0                      | 0                       | 0                       | 0                            | 0        | 0                   | 0                                                                                         | Melanin biosynthesis        | Scytalone dehydratase                                          | Mutation                   |
| IPR011683      | 1                            | 1                           | 1                           | 0                         | 1                         | 1                        | 0                      | 0                       | 0                       | 0                            | 0        | 0                   | 0                                                                                         | Glycoside hydrolase         | Glycosyl hydrolase 53                                          | Absence                    |
| IPR005874      | 1                            | 1                           | 1                           | 0                         | 1                         | 1                        | 3                      | 1                       | 1                       | 1                            | 1        | 1                   | 1                                                                                         | Translation                 | Eukaryotic translation initiation fac SU1                      | Mutation                   |

The cells are coloured based on the number of occurrences (0 is white, 1 and 2 are yellow, 3 is orange, and 4 or more is red).

Interpro entry names are taken from Interpro and each category represents a classification by the authors. The column labeled

“Reason for Interpro entry count difference in *T. reesei* versus euascomycetes” is explained in the text.

**Supplementary Table 4.** CAZyme families having a statistically different distribution in *T. reesei* compared to other fungal genomes. The highest and lowest number of entries in each category is indicated in red and blue. *T. reesei* appears in bold.

| Family <sup>a</sup>  | GH        | GH       | GH       | GH       | GH       | GH       | GH       | GH       | GH       | GH       | GT       | GT       | GT       | PL       | PL       | PL       |
|----------------------|-----------|----------|----------|----------|----------|----------|----------|----------|----------|----------|----------|----------|----------|----------|----------|----------|
|                      | 18        | 13       | 43       | 92       | 27       | 95       | 64       | 30       | 32       | 89       | 71       | 64       | 5        | 1        | 7        | 8        |
| Species <sup>b</sup> |           |          |          |          |          |          |          |          |          |          |          |          |          |          |          |          |
| A.nid                | 19        | 13       | 15       | 5        | 3        | 3        | 0        | 0        | 2        | 0        | 2        | 0        | 2        | 8        | 0        | 0        |
| A.fum                | 18        | 16       | 18       | 4        | 5        | 2        | 0        | 1        | 4        | 1        | 3        | 0        | 3        | 6        | 0        | 0        |
| A.ory                | 18        | 17       | 20       | 6        | 3        | 3        | 0        | 0        | 4        | 1        | 5        | 0        | 3        | 12       | 1        | 0        |
| M.gris               | 14        | 10       | 19       | 6        | 4        | 1        | 1        | 1        | 5        | 0        | 4        | 0        | 1        | 2        | 0        | 0        |
| N.cra                | 12        | 10       | 7        | 2        | 0        | 0        | 2        | 1        | 1        | 0        | 1        | 0        | 2        | 1        | 0        | 0        |
| <b>T.ree</b>         | <b>20</b> | <b>5</b> | <b>2</b> | <b>7</b> | <b>8</b> | <b>4</b> | <b>3</b> | <b>2</b> | <b>0</b> | <b>2</b> | <b>1</b> | <b>2</b> | <b>0</b> | <b>0</b> | <b>2</b> | <b>1</b> |
| F.gra                | 19        | 8        | 16       | 0        | 2        | 2        | 2        | 0        | 5        | 0        | 4        | 2        | 0        | 9        | 0        | 0        |
| C.alb                | 5         | 4        | 0        | 1        | 0        | 0        | 0        | 0        | 0        | 0        | 12       | 0        | 0        | 0        | 0        | 0        |
| S.cer                | 2         | 8        | 0        | 0        | 0        | 0        | 0        | 0        | 1        | 0        | 6        | 0        | 0        | 0        | 0        | 0        |
| C.gla                | 2         | 2        | 0        | 0        | 0        | 0        | 0        | 0        | 0        | 0        | 15       | 0        | 0        | 0        | 0        | 0        |
| S.pom                | 1         | 12       | 0        | 0        | 1        | 0        | 0        | 0        | 2        | 0        | 0        | 0        | 5        | 0        | 0        | 0        |
| C.neo                | 4         | 11       | 0        | 1        | 0        | 0        | 0        | 0        | 1        | 0        | 2        | 0        | 1        | 0        | 0        | 0        |
| P.chr                | 11        | 9        | 4        | 4        | 3        | 1        | 0        | 1        | 0        | 2        | 0        | 0        | 1        | 0        | 0        | 1        |

<sup>a</sup>Enzymes abbreviated based on CAZyme classification.

<sup>b</sup>Species abbreviations: A.nid (*Aspergillus nidulans*), A.fum (*Aspergillus fumigatus*), A.ory (*Aspergillus oryzae*), M.gris (*Magnaporthe grisea*), N.cra (*Neurospora crassa*), T.ree (*Trichoderma reesei*), F.gram (*Fusarium graminearum*), C.alb (*Candida albicans*), S.cer (*Saccharomyces cerevisiae*), C.gla (*Candida glabrata*), S.pom (*Schizosaccharomyces pombe*), C.neo (*Cryptococcus neoformans*), P.chr (*Phanerochaete chrysosporium*).

References as in text.



**Supplementary Table 5.** Comparison of the abundance of families of pectin-degrading enzymes predicted from the genome sequences of 13 fungal species. Abbreviations: GH, glycoside hydrolases; PL, polysaccharide lyases; CE8, pectin methylesterases. The highest and lowest number of entries in each family is indicated in red and blue. *T. reesei* appears in bold.

| Family <sup>a</sup><br>Species <sup>b</sup> | GH2<br>8 | GH88 | GH105 | PL1 | PL3 | PL4 | PL9 | CE8 | Total |
|---------------------------------------------|----------|------|-------|-----|-----|-----|-----|-----|-------|
| A.nid                                       | 9        | 2    | 3     | 8   | 5   | 4   | 1   | 3   | 35    |
| A.fum                                       | 14       | 2    | 2     | 6   | 3   | 3   | 1   | 6   | 37    |
| A.ory                                       | 20       | 3    | 2     | 12  | 3   | 4   | 1   | 5   | 50    |
| M.gris                                      | 3        | 1    | 3     | 2   | 1   | 1   | 0   | 1   | 12    |
| N.cra                                       | 2        | 0    | 1     | 1   | 1   | 1   | 0   | 1   | 7     |
| <b>T.ree</b>                                | 4        | 0    | 1     | 0   | 0   | 0   | 0   | 0   | 5     |
| F.gra                                       | 6        | 1    | 3     | 9   | 7   | 3   | 1   | 5   | 35    |
| C.alb                                       | 0        | 0    | 0     | 0   | 0   | 0   | 0   | 0   | 0     |
| S.cer                                       | 1        | 0    | 0     | 0   | 0   | 0   | 0   | 0   | 1     |
| C.gla                                       | 0        | 0    | 0     | 0   | 0   | 0   | 0   | 0   | 0     |
| S.pom                                       | 0        | 0    | 0     | 0   | 0   | 0   | 0   | 0   | 0     |
| C.neo                                       | 1        | 0    | 1     | 0   | 0   | 1   | 0   | 0   | 3     |
| P.chr                                       | 4        | 1    | 0     | 0   | 0   | 0   | 0   | 2   | 7     |

<sup>a</sup>Enzymes abbreviated based on CAZyme classification<sup>33</sup>.

<sup>b</sup>Species abbreviations: A.nid (*Aspergillus nidulans*), A.fum (*Aspergillus fumigatus*), A.ory (*Aspergillus oryzae*), M.gris (*Magnaporthe grisea*), N.cra (*Neurospora crassa*), T.ree (*Trichoderma reesei*), F.gra (*Fusarium graminearum*), C.alb (*Candida albicans*), S.cer (*Saccharomyces cerevisiae*), C.gla (*Candida glabrata*), S.pom (*Schizosaccharomyces pombe*), C.neo (*Cryptococcus neoformans*), P.chr (*Phanerochaete chrysosporium*).

**Supplemental Table 6.** Genes encoding components of the *T. reesei* secretion pathway.

Distribution of transport-related small GTPases.

| <i>T. reesei</i> <sup>a</sup>                       | <i>N. crassa</i> <sup>b</sup> | <i>S. cerevisiae</i> <sup>c</sup> | Mammals <sup>d</sup> | Proposed role <sup>e</sup> |
|-----------------------------------------------------|-------------------------------|-----------------------------------|----------------------|----------------------------|
| <b>Rab proteins</b>                                 |                               |                                   |                      |                            |
| Found in <i>S. cerevisiae</i> and filamentous fungi |                               |                                   |                      |                            |
| YPT1                                                | NCU08477.1                    | Ypt1p                             | Rab1                 | ER-GA, IGA, GA-ER          |
| tre44010                                            | NCU06404.1                    | Sec4p                             | Rab8                 | LGA-PM                     |
| tre43000                                            | NCU01532.1                    | Ypt31/32p                         | Rab11                | IGA, LGA-PM?               |
| tre42061                                            | NCU05234.1                    | Ypt6p                             | Rab6                 | IGA, LGA-LE, LE-LGA        |
| tre17707                                            | NCU03711.1                    | Ypt7p                             | Rab7                 | LE-V                       |
| tre44333,<br>tre42834                               | NCU00895.1<br>NCU06410.1      | Ypt51/52/53p                      | Rab5                 | PM-EE, EE-LE               |
| Not found in <i>S. cerevisiae</i>                   |                               |                                   |                      |                            |
| tre24935<br>tre29515                                | NCU00889.1                    |                                   | Rab4                 | EE-PM                      |
| tre31007                                            | NCU01647.1                    |                                   | Rab2                 | ER-GA, GA-ER               |
| tre33269                                            | NCU08271.1                    |                                   | Rab5?                | PM-EE?, EE-LE?             |
|                                                     | NCU01453.1                    |                                   | Rab18?               | PM-EE?, EE-PM?             |
| <b>Arf and Arf-like proteins</b>                    |                               |                                   |                      |                            |
| Found in <i>S. cerevisiae</i> and filamentous fungi |                               |                                   |                      |                            |
| tre43177                                            | NCU08340.1                    | Arf1/2p                           | Arf1                 | GA-ER, IGA, LGA, PM        |
| tre28367                                            | NCU08989.1                    | Arl1p                             | Arl1                 | LGA                        |
| tre38187                                            | NCU00333.1                    | Arl3p                             | Arl3                 | LGA                        |
| tre298890                                           | NCU00218.1                    | Arf3p                             | Arl2                 | ?                          |
| SAR1                                                | NCU00381.1                    | Sar1p                             | Sar1                 | ER-GA                      |
| Not found in <i>S. cerevisiae</i>                   |                               |                                   |                      |                            |
| tre42316                                            | NCU07173.1                    |                                   | Arf6                 | PM-EE                      |
| tre45468                                            | NCU08618.1                    |                                   | Arl10                | ?                          |

<sup>a</sup>*T. reesei* gene model number. <sup>b</sup>*N. crassa* gene model. <sup>c</sup>*S. cerevisiae* gene designation. <sup>d</sup>Functional equivalent in mammals. <sup>e</sup>Abbreviations used: ER, endoplasmic reticulum; GA, Golgi apparatus; IGA, intermediate Golgi apparatus; LGA, late Golgi apparatus; PM, plasma membrane; EE, early endosome, LE, late endosome, V, vacuole, ?, uncertain or unknown.

**Supplementary Table 7.** Scaffold locations of “CAZy clusters.” With regard to G+C content, there seems to be no significant deviation from the mean in any cluster and the furthest deviation from the mean is a cluster on scaffold\_33, with a G+C content of 39%. This seems to be due to a Copia transposable element in the intergenic space in the cluster.

| Cluster No. | position                          | G+C% | Length | # CAZy Genes | CAZy Genes% in cluster | p-value   |
|-------------|-----------------------------------|------|--------|--------------|------------------------|-----------|
| 1           | <b>scaffold_1:410000-530000</b>   | 53%  | 120000 | 5            | 17%                    | 3.02E-003 |
| 2           | <b>scaffold_1:2250000-2500000</b> | 49%  | 250000 | 9            | 13%                    | 5.01E-004 |
| 3           | <b>scaffold_2:1580000-1855000</b> | 54%  | 275000 | 8            | 12%                    | 2.22E-003 |
| 4           | <b>scaffold_3:8500-238500</b>     | 53%  | 230000 | 10           | 12%                    | 4.93E-004 |
| 5           | <b>scaffold_3:1214000-1232000</b> | 56%  | 17692  | 3            | 43%                    | 1.34E-003 |
| 6           | <b>scaffold_3:1755000-1850000</b> | 51%  | 95000  | 4            | 14%                    | 1.55E-002 |
| 7           | <b>scaffold_5:55000-190000</b>    | 51%  | 135000 | 7            | 15%                    | 9.92E-004 |
| 8           | <b>scaffold_6:10000-148000</b>    | 51%  | 138000 | 5            | 13%                    | 9.87E-003 |
| 9           | <b>scaffold_7:1230000-1400000</b> | 50%  | 170000 | 6            | 12%                    | 7.59E-003 |

**Supplementary Table 8.** Accession numbers of previously described CAZymes that occur in clustered areas.

| <b>Gene</b>        | <b>Caazy Family</b> | <b>Function</b>       | <b>Accession</b> | <b>EC code</b> |
|--------------------|---------------------|-----------------------|------------------|----------------|
| <i>cbh1/cel7a</i>  | GH7                 | Cellobiohydrolase     |                  | 3.2.1.91       |
| <i>cbh2/cel6a</i>  | GH6                 | Cellobiohydrolase     | M16190           | 3.2.1.91       |
| <i>egl1/cel7b</i>  | GH7                 | Endo-1,4-glucanase    | M15665           | 3.2.1.4        |
| <i>egl2/cel5a</i>  | GH5                 | Endo-1,4-glucanase    | M19373           | 3.2.1.4        |
| <i>egl3/cel12a</i> | GH12                | Endo-1,4-glucanase    | AB003694         | 3.2.1.4        |
| <i>egl4/cel61a</i> | GH61                | Endo-1,4-glucanase    | Y111113          | 3.2.1.4        |
| <i>bgl1/cel3a</i>  | GH3                 | -Glucosidase          | U09580           | 3.2.1.21       |
| <i>xyn1</i>        | GH11                | Xylanase              | X69574           | 3.2.1.8        |
| <i>xyn2</i>        | GH11                | Xylanase              | X69573           | 3.2.1.8        |
| <i>xyn3</i>        | GH10                | Xylanase              | AB036796         | 3.2.1.8        |
| <i>xyn4</i>        | GH5                 | Xylanase              |                  | 3.2.1.8        |
| <i>bxl1</i>        | GH3                 | -Xylosidase           | Z69257           | 3.2.1.37       |
| <i>axe1</i>        | CE5                 | Acetyl xylan esterase | Z69256           | 3.1.1.72       |
| <i>abf1</i>        | GH54                | Arabinofuranosidase   | Z69252           | 3.2.1.55       |
| <i>agl2</i>        | GH36                | -Galactosidase        | Z69254           | 3.2.1.22       |
| <i>agl3</i>        | GH27                | -Galactosidase        | Z69255           | 3.2.1.22       |
| <i>swo1</i>        | EXPN                | Expansin-like         | AJ245918         | Unknown        |
| <i>cip1</i>        | CBM1                | Unknown               | AY281370         | Unknown        |
| <i>cip2</i>        | CBM1                | Glucuronoyl esterase  | AY281368         | Unknown        |

**Supplementary Table 9.** Non-ribosomal peptide synthase (NRPS) and polyketide synthase (PKS) genes identified in the *T. reesei* genome.

| Type     | Genelid | Scaffold position          |
|----------|---------|----------------------------|
| NRPS     | 123786  | scaffold_26:276842-327620  |
| NRPS     | 23171   | scaffold_24:123560-193077  |
| NRPS     | 71005   | scaffold_46:26764-32978    |
| NRPS     | 60458   | scaffold_7:1346092-1352756 |
| NRPS     | 69946   | scaffold_31:39880-54649    |
| NRPS     | 68204   | scaffold_24:269353-272917  |
| NRPS     | 81014   | scaffold_22:47425-51332    |
| NRPS     | 24586   | scaffold_1:2715190-2721980 |
| NRPS     | 67189   | scaffold_20:536612-542052  |
| NRPS     | 60751   | scaffold_8:523737-526732   |
| PKS      | 73621   | scaffold_1:491045-499127   |
| PKS      | 65172   | scaffold_15:76106-84410    |
| PKS      | 105804  | scaffold_6:62708-69489     |
| PKS      | 106272  | scaffold_7:215526-224521   |
| PKS      | 82208   | scaffold_33:8794-15745     |
| PKS      | 59482   | scaffold_6:489751-496726   |
| PKS      | 73618   | scaffold_1:482161-490277   |
| PKS      | 60118   | scaffold_7:961671-969559   |
| PKS      | 81964   | scaffold_29:36588-42408    |
| PKS      | 65116   | scaffold_15:571323-578930  |
| PKS      | 65891   | scaffold_17:631544-639144  |
| PKS-NRPS | 58285   | scaffold_5:25620-37773     |
| PKS-NRPS | 105864  | scaffold_6:241163-242628   |
